# Supplementary material
Source: PubMed Central journal article supplement (PMC3754610)
Supplement: JB.00296-13_zjb999092759so1.pdf [file JB.00296-13_zjb999092759so1.pdf]

## Supplementary material

**Sequencing and analysis of the phage 2 genome.** Coliphage 2 lysate was provided by the Félix d'Hérelle Reference Center for Bacterial Viruses (#HER256). Phage DNA was prepared using the Lambda maxi kit (Qiagen) and sequenced at the Plateforme d'analyses génomiques de l'Université Laval using the 454 pyrosequencing method. The assembling of the different contigs was done with GS De novo Assembler with a coverage of 132X. The sequence was completed and validated by primer walking with the Sanger sequencing method. GeneMark (1) and Orf Finder (NCBI) tools were used to identify potential *orf* with at least 30 codons and with a putative RBS sequence (consensus AGGAGGT) preceding the first starting codon (AUG, GUG or CUG). Comparison of the gene products was done with BLAST (NCBI). The sequence was edited using the Bioedit software (<http://www.mbio.ncsu.edu/bioedit/bioedit.html>) and the genome map was done using Adobe Illustrator. To find tRNA sequences, tRNA-scan SE (2) and ARAGORN (3) servers were used.

**Coliphage 2 genome characterization.** Bacteriophage 2 was used as an *E. coli* O157-H7 typing phage (4) and it also infect the *E. coli* strain MG1655 (K-12) (5). Its 136,910 kb genome has a GC content of 43.6%. Nucleotide comparison of the phage 2 complete genome has reveal its close relatedness with the *E. coli* phages rv5 (GenBank # NC\_011041, 92.7% identity in nucleotides) and vB\_EcoM\_FV3 (GenBank # NC\_019517, 87.2% identity in nucleotides, (6)). Four gene clusters oriented in opposite direction have been identified (Fig. S1). Phage 2 possesses 220 open reading frames and 4 tRNA (Fig. S1). Only 23.2% of the ORFs could be associated to a putative function, which is very low, but similar to other rv5-like viruses (6).

24 **Table S1.** List of probes used for the Northern blot experiments

| Probe name | Sequence <sup>a</sup>             | Relevant characteristics                            |
|------------|-----------------------------------|-----------------------------------------------------|
| orf33_s1   | GTCGGCACTATGCCAATGAATACGGTGTGGA   | <i>orf33</i> of P008, detect anti-sense transcript  |
| orf33_s2   | GTCCACACCGTATTCATTGGCATAAGTCCGA   | <i>orf33</i> of P008, detect sense transcript       |
| orf36_s1   | GTAGCTAAATACGTCGGAGTTACCCAGCCAG   | <i>orf36</i> of P008, detect anti-sense transcript  |
| orf36_s2   | GCTGGCTGGGTAACCTCCGACGTATTTAGCTA  | <i>orf36</i> of P008, detect sense transcript       |
| orf37_s1   | GGGCAAACCTTGGACGACACGCACAGCAAATT  | <i>orf37</i> of P008, detect anti-sense transcript  |
| orf37_s2   | GAATTTGCTGTGCGTGTCTCCAAGTTTGCC    | <i>orf37</i> of P008, detect sense transcript       |
| orf38_s1   | GTGCCCTTTGACTTCGACGGAGAACAGCAAT   | <i>orf38</i> of P008, detect anti-sense transcript  |
| orf38_s2   | GATTGCTGTTCTCCGTCGAAGTCAAAGGGCA   | <i>orf38</i> of P008, detect sense transcript       |
| orf39_s1   | GAAAGTCGCGTACGGTTCAGCATTCTTGCT    | <i>orf39</i> of P008, detect anti-sense transcript  |
| orf39_s2   | GAGGCAAGAATGCTGAACCGTACGCGACTTT   | <i>orf39</i> of P008, detect sense transcript       |
| orf40_s1   | GAAGCAACGACTTAGAGAGATCCAGCCAGCACT | <i>orf40</i> of P008, detect anti-sense transcript  |
| orf40_s2   | GAGTGCTGGCTGGATCTCTCTAAGTCGTTGCTT | <i>orf40</i> of P008, detect sense transcript       |
| orf41_s1   | GGAGCTTTCAGATACAGCACGTGAAGAACCA   | <i>orf41</i> of P008, detect anti-sense transcript  |
| orf41_s2   | GTGGTTCTTCACGTGCTGTATCTGAAAGCTC   | <i>orf41</i> of P008, detect sense transcript       |
| orf45_s1   | GGGCTTGGTCGTGCTGAATTTCTAGTCAGAC   | <i>orf45</i> of P008, detect anti-sense transcript  |
| orf45_s2   | GGTCTGACTAGAAATTCAGCACGACCAAGCC   | <i>orf45</i> of P008, detect sense transcript       |
| orf52_s1   | GGTACTTACGACAGCAGGAATACAAGAAGCG   | <i>orf52</i> of P008, detect anti-sense transcript  |
| orf52_s2   | GCGCTTCTTGATTCCTGCTGTCGTAAGTAC    | <i>orf52</i> of phage P008, detect sense transcript |
| orf53_s1   | GCGAGTTCTTACTTAATGCTGTTGAATGTGG   | <i>orf53</i> of P008, detect anti-sense transcript  |
| orf53_s2   | GCCACATTCAACAGCATTAAAGTAAGAAGCTCG | <i>orf53</i> of P008, detect sense transcript       |

25 <sup>a</sup> A G is added at the 5' end of each probe to increase radiolabelling efficiency

26

**Table S2.** Analysis of the phage 2 genome. ORF annotation, proteins characterization, putative function, and comparison with the public databases.

| ORF   | Start position | Stop position | Size (a.a.) | MM (kDa) | pI   | Putative RBS and start codon <sup>a</sup> | Predicted function            | Best match BLASTP                                                   | E value | Size (a.a.) | ID <sup>b</sup> | Accession number |
|-------|----------------|---------------|-------------|----------|------|-------------------------------------------|-------------------------------|---------------------------------------------------------------------|---------|-------------|-----------------|------------------|
| orf1  | 1983           | 1             | 660         | 75.8     | 8.3  | <u>AGGAGCGCAA</u><br>TAAATG               | rIIA                          | rIIA_gp001 [Escherichia phage rv5]                                  | 0       | 660         | 649/660 (98%)   | YP_002003503     |
| orf2  | 2480           | 1980          | 166         | 19       | 10.0 | <u>TGGAGT</u> TATTG<br>TG                 | cell wall hydrolase SleB      | SleB_gp002 [Escherichia phage rv5]                                  | 9E-121  | 166         | 165/166 (99%)   | YP_002003504     |
| orf3  | 2910           | 2530          | 126         | 14.6     | 4.4  | <u>AGGAGGTT</u> GT<br>ATG                 | hypothetical protein          | rv5_gp003 [Escherichia phage rv5]                                   | 8E-87   | 126         | 126/126 (100%)  | YP_002003505     |
| orf4  | 4104           | 2920          | 394         | 43.4     | 5.0  | <u>AGGACTTT</u> TAC<br>TAATG              | MoxR ATPase                   | MoxR ATPase_gp004 [Escherichia phage rv5]                           | 0       | 394         | 394/394 (100%)  | YP_002003506     |
| orf5  | 4373           | 4104          | 89          | 10.8     | 5.4  | <u>AGGAGTAG</u> TA<br>GAGATG              | hypothetical protein          | rv5_gp005 [Escherichia phage rv5]                                   | 8E-59   | 89          | 89/89 (100%)    | YP_002003507     |
| orf6  | 4798           | 4418          | 126         | 14.8     | 4.3  | <u>AGGTGG</u> ACTG<br>ATAATG              | hypothetical protein          | rv5_gp006 [Escherichia phage rv5]                                   | 6E-88   | 126         | 125/126 (99%)   | YP_002003508     |
| orf7  | 5058           | 4801          | 85          | 9.8      | 4.3  | <u>AGGAGGT</u> AGA<br>ATAATG              | hypothetical protein          | rv5_gp007 [Escherichia phage rv5]                                   | 2E-53   | 85          | 83/85 (98%)     | YP_002003509     |
| orf8  | 5414           | 5058          | 118         | 13.3     | 4.2  | <u>AGGAGAC</u> CTT<br>ACCGATG             | hypothetical protein          | rv5_gp008 [Escherichia phage rv5]                                   | 2E-71   | 118         | 106/109 (97%)   | YP_002003510     |
| orf9  | 5700           | 5428          | 90          | 10.2     | 6.2  | <u>CGGGGA</u> TTTGA<br>CTATG              | hypothetical protein          | rv5_gp009 [Escherichia phage rv5]                                   | 5E-60   | 90          | 89/90 (99%)     | YP_002003511     |
| orf10 | 6602           | 5703          | 299         | 33.7     | 5.0  | <u>AGGAGCA</u> CTC<br>ACTCATG             | alpha 1-3 fucosyl-transferase | putative alpha 1-3 fucosyltransferase_gp010 [Escherichia phage rv5] | 0       | 299         | 299/299 (100%)  | YP_002003512     |
| orf11 | 6745           | 7722          | 325         | 37.7     | 4.7  | <u>ACGAGAG</u> ACA<br>ACTCATG             | anti-sigma factor             | anti-sigma factor_gp011 [Escherichia phage rv5]                     | 0       | 311         | 310/311 (99%)   | YP_002003513     |
| orf12 | 7756           | 9216          | 486         | 54.9     | 7.1  | <u>TGGAGT</u> TTTAA<br>TG                 | hypothetical protein          | FV3_00012[Enterobacteria phage vB_EcoM-FV3]                         | 0       | 497         | 477/486 (98%)   | AEZ65148         |
| orf13 | 9232           | 9489          | 85          | 9.4      | 4.6  | <u>AGGATG</u> TTATT<br>TATG               | hypothetical protein          | FV3_00013 [Enterobacteria phage vB_EcoM-FV3]                        | 8E-53   | 89          | 84/85 (99%)     | AEZ65149         |
| orf14 | 9489           | 9752          | 87          | 10       | 4.5  | <u>AGGAGG</u> GAGTA<br>ATG                | hypothetical protein          | rv5_gp015 [Escherichia phage rv5]                                   | 6E-56   | 87          | 86/87 (99%)     | YP_002003517     |
| orf15 | 9754           | 9987          | 77          | 8.8      | 4.5  | <u>AGAGGG</u> ITTCT<br>AATATG             | hypothetical protein          | rv5_gp016 [Escherichia phage rv5]                                   | 2E-47   | 77          | 76/77 (99%)     | YP_002003518     |
| orf16 | 10004          | 10453         | 149         | 17.4     | 5.1  | <u>AGGAGAT</u> AGC<br>CGTG                | hypothetical protein          | rv5_gp017 [Escherichia phage rv5]                                   | 2E-100  | 149         | 143/149 (96%)   | YP_002003519     |
| orf17 | 10450          | 10695         | 81          | 9.3      | 7.9  | <u>AGGAGCT</u> ATA<br>CCTGTTATG           | hypothetical protein          | rv5_gp018 [Escherichia phage rv5]                                   | 1E-53   | 81          | 81/81 (100%)    | YP_002003520     |
| orf18 | 10698          | 11264         | 188         | 21.4     | 5.8  | <u>TGGAGC</u> TATAG<br>TCATG              | hypothetical protein          | rv5_gp019 [Escherichia phage rv5]                                   | 1E-135  | 188         | 188/18 (100%)   | YP_002003521     |
| orf19 | 11322          | 11597         | 91          | 10.4     | 4.8  | <u>AGGAGAG</u> ACT<br>GAGATG              | hypothetical protein          | rv5_gp020 [Escherichia phage rv5]                                   | 1E-59   | 91          | 91/91 (100%)    | YP_002003522     |
| orf20 | 11600          | 12064         | 154         | 18       | 4.5  | <u>AGAAGG</u> TGTG<br>AATATG              | hypothetical protein          | rv5_gp021 [Escherichia phage rv5]                                   | 2E-110  | 154         | 154/154 (100%)  | YP_002003523     |
| orf21 | 12070          | 12240         | 56          | 6.9      | 8.2  | <u>CGGAG*</u> TAAGA<br>GCCATG             | hypothetical protein          | rv5_gp022 [Escherichia phage rv5]                                   | 1E-32   | 56          | 56/56 (100%)    | YP_002003524     |
| orf22 | 12113          | 12262         | 49          | 5.5      | 9.5  | <u>TGGAG</u> ITTATA<br>TCAAAATG           | hypothetical protein          | rv5_gp023 [Escherichia phage rv5]                                   | 2E-25   | 49          | 49/49 (100%)    | YP_002003525     |
| orf23 | 12293          | 12673         | 126         | 14.2     | 9.4  | <u>CGGAGAC</u> TGA<br>TTAAATG             | hypothetical protein          | rv5_gp024 [Escherichia phage rv5]                                   | 2E-87   | 126         | 126/126 (100%)  | YP_002003526     |
| orf24 | 12837          | 13244         | 135         | 15.5     | 5.2  | <u>AGGAGAC</u> IGC<br>CATG                | hypothetical protein          | rv5_gp025 [Escherichia phage rv5]                                   | 1E-95   | 135         | 135/135 (100%)  | YP_002003527     |
| orf25 | 13248          | 13448         | 66          | 7.5      | 4.3  | <u>AGGAC*</u> TGAGA<br>AATG               | hypothetical protein          | rv5_gp026 [Escherichia phage rv5]                                   | 2E-40   | 66          | 66/66 (100%)    | YP_002003528     |
| orf26 | 19023          | 13498         | 1841        | 204.4    | 6.3  | no RBS                                    | hypothetical protein          | rv5_gp027 [Escherichia phage rv5]                                   | 0       | 1878        | 1784/1833 (97%) | YP_002003529     |
| orf27 | 20917          | 19172         | 581         | 62.5     | 4.8  | <u>AGGAGAA</u> ATC<br>ATG                 | tail fiber protein            | tail fiber protein_gp28 [Escherichia phage rv5]                     | 0       | 581         | 575/581 (99%)   | YP_002003530     |
| orf28 | 21193          | 20927         | 88          | 10       | 6.8  | <u>AGAGGG</u> TAAA<br>TG                  | hypothetical protein          | rv5_gp029 [Escherichia phage rv5]                                   | 1E-59   | 88          | 88/88 (100%)    | YP_002003531     |
| orf29 | 22246          | 21203         | 347         | 38.4     | 6.0  | <u>AGGAGA</u> ACGC<br>GATG                | tail fiber protein            | tail fiber [Enterobacteria phage vB_EcoM-FV3]                       | 0       | 347         | 340/347 (98%)   | AEZ65166         |
| orf30 | 22650          | 22336         | 104         | 11.9     | 7.0  | <u>AGGAGG</u> TGTT<br>GTG                 | hypothetical protein          | rv5_gp031 [Escherichia phage rv5]                                   | 1E-67   | 104         | 103/104 (99%)   | YP_002003533     |
| orf31 | 23246          | 22662         | 194         | 22.6     | 4.6  | <u>CGGAGG</u> ACTA<br>GCATG               | tail fiber assembly protein   | tail fiber assembly protein_gp032 [Escherichia phage rv5]           | 7E-139  | 194         | 192/194 (99%)   | YP_002003534     |
| orf32 | 24301          | 23261         | 346         | 38.3     | 5.5  | <u>AGGAGAT</u> AAA<br>ATG                 | tail fiber protein            | tail fiber protein_gp033 [Escherichia phage rv5]                    | 0       | 346         | 345/346 (99%)   | YP_002003535     |
| orf33 | 26386          | 24314         | 690         | 79.1     | 5.0  | <u>AGGAGG</u> GTTA<br>ATG                 | hypothetical protein          | rv5_gp034 [Escherichia phage rv5]                                   | 0       | 690         | 687/690 (99%)   | YP_002003536     |
| orf34 | 27072          | 26386         | 228         | 25.4     | 4.6  | <u>AGGCGG</u> CGAG<br>ATATG               | hypothetical protein          | rv5_gp035 [Escherichia phage rv5]                                   | 3E-165  | 228         | 228/228 (100%)  | YP_002003537     |

|       |       |       |      |       |     |                         |                                              |                                                                            |        |      |                    |                  |
|-------|-------|-------|------|-------|-----|-------------------------|----------------------------------------------|----------------------------------------------------------------------------|--------|------|--------------------|------------------|
| orf35 | 28574 | 27084 | 496  | 54.7  | 4.9 | CGGAGGAGTG<br>ACGTG     | baseplate<br>component                       | rv5_gp036 [Escherichia<br>phage rv5]                                       | 0      | 496  | 493/496<br>(99%)   | YP_002<br>003538 |
| orf36 | 32279 | 28680 | 1199 | 131.8 | 5.5 | TGGAGGATTA<br>ATG       | tail fiber /phage<br>host specificity        | tail fiber protein_gp037<br>[Escherichia phage rv5]                        | 0      | 1279 | 1068/1279<br>(84%) | YP_002<br>003539 |
| orf37 | 32704 | 32279 | 141  | 16.7  | 5.3 | TGGGAGGTTTA<br>ATG      | hypothetical<br>protein                      | rv5_gp038 [Escherichia<br>phage rv5]                                       | 1E-100 | 141  | 141/141<br>(100%)  | YP_002<br>003540 |
| orf38 | 33255 | 32704 | 183  | 19.9  | 4.7 | AGGATTCTAA<br>GATG      | hypothetical<br>protein                      | rv5_gp039 [Escherichia<br>phage rv5]                                       | 5E-131 | 183  | 183/183<br>(100%)  | YP_002<br>003541 |
| orf39 | 33847 | 33257 | 196  | 22    | 9.2 | TGGAGGCACA<br>ATG       | hypothetical<br>protein                      | rv5_gp040 [Escherichia<br>phage rv5]                                       | 2E-140 | 196  | 196/196<br>(100%)  | YP_002<br>003542 |
| orf40 | 37765 | 33947 | 1272 | 139.4 | 5.5 | AGGAGAAAGA<br>ATG       | tail fiber<br>protein                        | tail fiber protein_gp041<br>[Escherichia phage rv5]                        | 0      | 1272 | 1242/1272<br>(98%) | YP_002<br>003543 |
| orf41 | 40398 | 37801 | 865  | 97.8  | 5.5 | AGGAGCTATCT<br>AAGATG   | phage tail<br>protein                        | rv5_gp042 [Escherichia<br>phage rv5]                                       | 0      | 865  | 862/865<br>(99%)   | YP_002<br>003544 |
| orf42 | 41068 | 40400 | 222  | 24.2  | 4.4 | AGGAGAAATC<br>ATG       | tail fiber<br>protein                        | rv5_gp043 [Escherichia<br>phage rv5]                                       | 5E-158 | 222  | 222/222<br>(100%)  | YP_002<br>003545 |
| orf43 | 41794 | 41078 | 238  | 27.5  | 4.5 | AG*AGGGCTTT<br>CATG     | hypothetical<br>protein                      | rv5_gp044 [Escherichia<br>phage rv5]                                       | 4E-175 | 238  | 238/238<br>(100%)  | YP_002<br>003546 |
| orf44 | 42484 | 41807 | 225  | 24.5  | 4.8 | AGGAGGTATA<br>ATG       | baseplate<br>protein                         | rv5_gp045 [Escherichia<br>phage rv5]                                       | 8E-166 | 225  | 225/225<br>(100%)  | YP_002<br>003547 |
| orf45 | 43488 | 42484 | 334  | 37    | 9.0 | AAG*GGTAGA<br>ATAATG    | hypothetical<br>protein                      | rv5_gp046 [Escherichia<br>phage rv5]                                       | 0      | 334  | 333/334<br>(99%)   | YP_002<br>003548 |
| orf46 | 43868 | 43488 | 126  | 14.8  | 4.6 | AGG*GGAGCGT<br>ATAATG   | hypothetical<br>protein                      | rv5_gp047 [Escherichia<br>phage rv5]                                       | 2E-86  | 126  | 125/126<br>(99%)   | YP_002<br>003549 |
| orf47 | 44765 | 43881 | 294  | 32.8  | 5.4 | AG*AGGTATG              | hypothetical<br>protein                      | rv5_gp048 [Escherichia<br>phage rv5]                                       | 0      | 294  | 294/294<br>(100%)  | YP_002<br>003550 |
| orf48 | 47207 | 44871 | 778  | 85.6  | 9.8 | ATGAGGAAAC<br>CATG      | tape measure<br>protein                      | rv5_gp049 [Escherichia<br>phage rv5]                                       | 0      | 778  | 774/778<br>(99%)   | YP_002<br>003551 |
| orf49 | 47631 | 47263 | 122  | 13.9  | 8.6 | TGGAGGTTAAC<br>TACGGCTG | hypothetical<br>protein                      | rv5_gp050 [Escherichia<br>phage rv5]                                       | 1E-83  | 122  | 121/122<br>(99%)   | YP_002<br>003552 |
| orf50 | 47996 | 47523 | 157  | 17.2  | 4.4 | AGGATGCTATA<br>AAATG    | hypothetical<br>protein                      | rv5_gp051 [Escherichia<br>phage rv5]                                       | 1E-109 | 157  | 157/157<br>(100%)  | YP_002<br>003553 |
| orf51 | 48632 | 48159 | 157  | 17.1  | 4.6 | AGGAAGACTA<br>GATG      | structural<br>protein                        | structural [Enterobacteria<br>phage vB_EcoM-FV3]                           | 2E-109 | 157  | 157/157<br>(100%)  | AEZ651<br>88     |
| orf52 | 50019 | 48643 | 458  | 50.3  | 5.2 | AAGAGGAAAC<br>AAATG     | structural<br>protein                        | structural protein_gp053<br>[Escherichia phage rv5]                        | 0      | 458  | 455/458<br>(99%)   | YP_002<br>003555 |
| orf53 | 50643 | 50092 | 183  | 20.4  | 5.1 | AGGAGAAAAC<br>TGATG     | hypothetical<br>protein                      | rv5_gp054 [Escherichia<br>phage rv5]                                       | 3E-130 | 183  | 180/183<br>(98%)   | YP_002<br>003556 |
| orf54 | 51068 | 50643 | 141  | 15.9  | 5.3 | AGGGGGITGA<br>GTG       | hypothetical<br>protein                      | FV3_00055[Enterobacteria<br>phage vB_EcoM-FV3]                             | 4E-98  | 141  | 138/141<br>(98%)   | AEZ651<br>91     |
| orf55 | 51543 | 51085 | 152  | 17.2  | 8.7 | AGTGAGGAAT<br>ATAATG    | hypothetical<br>protein                      | rv5_gp056 [Escherichia<br>phage rv5]                                       | 8E-109 | 152  | 151/152<br>(99%)   | YP_002<br>003558 |
| orf56 | 52217 | 51597 | 206  | 23.4  | 4.5 | ACGAGGTTATT<br>TCAAATG  | hypothetical<br>protein                      | rv5_gp057 [Escherichia<br>phage rv5]                                       | 8E-143 | 206  | 203/206<br>(99%)   | YP_002<br>003559 |
| orf57 | 53131 | 52277 | 284  | 31    | 4.5 | AGGA*GTGTCC<br>CGTG     | hypothetical<br>protein                      | FV3_00058[Enterobacteria<br>phage vB_EcoM-FV3]                             | 1E-156 | 271  | 237/284<br>(83%)   | AEZ651<br>94     |
| orf58 | 54223 | 53213 | 336  | 37.9  | 5.8 | TGGAGAAAAT<br>AATG      | major head<br>protein                        | major head protein_gp060<br>[Escherichia phage rv5]                        | 0      | 336  | 290/331<br>(88%)   | YP_002<br>003562 |
| orf59 | 54644 | 54270 | 124  | 12.8  | 5.6 | AGG*GGAAAA<br>TAATG     | head<br>stabilization/de<br>coration protein | Head stabilization/<br>decoration protein_gp061<br>[Escherichia phage rv5] | 1E-52  | 129  | 90/123<br>(73%)    | YP_002<br>003563 |
| orf60 | 55646 | 54666 | 326  | 36.9  | 4.6 | AG*AGGGCAAT<br>GAGTAATG | hypothetical<br>protein                      | rv5_gp062 [Escherichia<br>phage rv5]                                       | 0      | 325  | 276/326<br>(85%)   | YP_002<br>003564 |
| orf61 | 56218 | 55646 | 190  | 21.6  | 4.9 | AGCAGGGCTG<br>GTGATG    | hypothetical<br>protein                      | rv5_gp063 [Escherichia<br>phage rv5]                                       | 2E-135 | 190  | 188/190<br>(99%)   | YP_002<br>003565 |
| orf62 | 57689 | 56133 | 518  | 57.1  | 6.1 | AGG*GGTAAA<br>GCTTGTG   | hypothetical<br>protein                      | rv5_gp064 [Escherichia<br>phage rv5]                                       | 0      | 518  | 517/518<br>(99%)   | YP_002<br>003566 |
| orf63 | 58808 | 57792 | 338  | 38.2  | 5.2 | <u>no RBS</u>           | large terminase<br>subunit                   | terminase large subunit<br>[Enterobacteria phage<br>vB_EcoM-FV3]           | 0      | 515  | 338/338<br>(100%)  | AEZ652<br>00     |
| orf64 | 59467 | 58988 | 159  | 19    | 8.7 | AGGAA*TGCTA<br>TATG     | recombination<br>endonuclease                | recombination endonuclease<br>VII [Segniliparus rugosus<br>ATCC BAA-974]   | 3E-12  | 146  | 39/84<br>(46%)     | ZP_102<br>46071  |
| orf65 | 60222 | 59794 | 142  | 16.1  | 7.7 | GAGAGGTTAA<br>TG        | Large<br>terminase<br>subunit                | terminase large subunit<br>[Enterobacteria phage<br>vB_EcoM-FV3]           | 3E-97  | 515  | 142/142<br>(100%)  | AEZ652<br>00     |
| orf66 | 60509 | 60222 | 95   | 10.4  | 9.2 | CAGGAGGATC<br>GATG      | hypothetical<br>protein                      | rv5_gp067 [Escherichia<br>phage rv5]                                       | 5E-60  | 95   | 92/95<br>(97%)     | YP_002<br>003569 |
| orf67 | 60904 | 60506 | 132  | 15.1  | 5.9 | TGGAGCCTTAA<br>AATG     | hypothetical<br>protein                      | rv5_gp068 [Escherichia<br>phage rv5]                                       | 1E-86  | 132  | 128/132<br>(97%)   | YP_002<br>003570 |
| orf68 | 61351 | 61010 | 113  | 13.3  | 5.7 | AGGAGGTCGA<br>GTG       | hypothetical<br>protein                      | rv5_gp069 [Escherichia<br>phage rv5]                                       | 8E-58  | 89   | 89/89<br>(100%)    | YP_002<br>003571 |
| orf69 | 62297 | 61959 | 112  | 13.1  | 4.9 | TGGAGGAAAC<br>ATG       | hypothetical<br>protein                      | rv5_gp070 [Escherichia<br>phage rv5]                                       | 2E-74  | 112  | 112/112<br>(100%)  | YP_002<br>003572 |
| orf70 | 62888 | 62646 | 80   | 9.3   | 4.2 | ACGAGGICTAC<br>AGGTAATG | hypothetical<br>protein                      | rv5_gp071 [Escherichia<br>phage rv5]                                       | 9E-52  | 80   | 80/80<br>(100%)    | YP_002<br>003573 |
| orf71 | 63153 | 62965 | 62   | 7.1   | 5.0 | AGGAGCGCTT<br>AATG      | hypothetical<br>protein                      | rv5_gp072 [Escherichia<br>phage rv5]                                       | 1E-36  | 62   | 61/62<br>(98%)     | YP_002<br>003574 |
| orf72 | 63742 | 63164 | 192  | 22.5  | 6.2 | AGGAGGCAGC<br>TATG      | hypothetical<br>protein                      | rv5_gp073 [Escherichia<br>phage rv5]                                       | 3E-132 | 192  | 182/192<br>(85%)   | YP_002<br>003575 |

|        |       |       |     |      |      |                               |                                                  |                                                                                 |        |     |                |               |
|--------|-------|-------|-----|------|------|-------------------------------|--------------------------------------------------|---------------------------------------------------------------------------------|--------|-----|----------------|---------------|
| orf73  | 64733 | 64383 | 116 | 12.8 | 9.2  | <u>AGGAGATATG</u>             | transcriptional regulator                        | transcriptional reg. gp075 [Escherichia phage rv5]                              | 4E-78  | 116 | 115/116 (99%)  | YP_002 003577 |
| orf74  | 65335 | 64781 | 184 | 21.4 | 6.3  | <u>ATGAGGAATG TATG</u>        | Phosphoester.                                    | phosphoesterase gp076 [Escherichia phage rv5]                                   | 1E-132 | 184 | 180/184 (98%)  | YP_002 003578 |
| orf75  | 65753 | 65343 | 136 | 15.8 | 6.5  | <u>CGGAGGATTG CTATG</u>       | hypothetical protein                             | rv5_gp077 [Escherichia phage rv5]                                               | 1E-96  | 136 | 135/136 (99%)  | YP_002 003579 |
| orf76  | 65875 | 66789 | 304 | 35.3 | 6.5  | <u>ATGAGGAACG TATGATG</u>     | RNA ligase and tail attachment protein           | RNA ligase 1 and tail attachment protein_gp078 [Escherichia phage rv5]          | 0      | 311 | 297/304 (98%)  | YP_002 003580 |
| orf77  | 66786 | 67136 | 116 | 13.5 | 5.7  | <u>AGGAC*TATAT GCAATG</u>     | hypothetical protein                             | FV3_00076 [Enterobacteria phage vB_EcoM-FV3]                                    | 6E-79  | 116 | 115/116 (99%)  | AEZ652 12     |
| orf78  | 67145 | 67906 | 253 | 28.6 | 4.9  | <u>CTGAGGACACT TATG</u>       | Sir2-like(NAD-dependent deacetylase)             | putative Sir2-like protein_gp080 [Escherichia phage rv5]                        | 0      | 253 | 251/253 (99%)  | YP_002 003582 |
| orf79  | 67920 | 68633 | 237 | 27.4 | 5.8  | <u>AGGAGACCTTT AATG</u>       | hypothetical protein                             | rv5_gp081 [Escherichia phage rv5]                                               | 1E-173 | 237 | 236/237 (99%)  | YP_002 003583 |
| orf80  | 68676 | 69005 | 109 | 12.9 | 6.4  | <u>TTGTGGAAAGT ATG</u>        | hypothetical protein                             | rv5_gp082 [Escherichia phage rv5]                                               | 2E-66  | 102 | 100/102 (98%)  | YP_002 003584 |
| orf81  | 68992 | 69261 | 89  | 10.4 | 4.6  | <u>AGGAGGACTG CAATG</u>       | hypothetical protein                             | rv5_gp083 [Escherichia phage rv5]                                               | 2E-58  | 89  | 89/89 (100%)   | YP_002 003585 |
| orf82  | 69261 | 70544 | 427 | 49.5 | 5.5  | <u>AAGAGGTAGA GTAATG</u>      | ATP-dependent DNA ligase                         | ATP-dependent DNA ligase [Enterobacteria phage vB_EcoM-FV3]                     | 0      | 427 | 420/427 (98%)  | AEZ652 17     |
| orf83  | 70687 | 71157 | 156 | 17.4 | 9.1  | <u>TGGAGAGTAT GAAAAATG</u>    | Lysozyme/End olysins                             | Lysozyme_gp085 [Escherichia phage rv5]                                          | 4E-110 | 156 | 155/156 (99%)  | YP_002 003587 |
| orf84  | 71221 | 71427 | 68  | 7.6  | 4.9  | <u>AGGAGGGTTT AACCATG</u>     | hypothetical protein                             | membrane protein_gp086 [Escherichia phage rv5]                                  | 3E-42  | 68  | 68/68 (100%)   | YP_002 003588 |
| orf85  | 71438 | 71902 | 154 | 17.7 | 8.4  | <u>ATGAGGGGAGA ACACGTG</u>    | HNH endonuclease                                 | HNH endonuclease_gp087 [Escherichia phage rv5]                                  | 2E-109 | 154 | 152/154 (99%)  | YP_002 003589 |
| orf86  | 71895 | 72185 | 96  | 11.2 | 9.8  | <u>AG*AGGGTTAC CTTGATG</u>    | transposase                                      | transposase protein_gp088 [Escherichia phage rv5]                               | 5E-23  | 96  | 91/96 (95%)    | YP_002 003590 |
| orf87  | 72245 | 72553 | 102 | 12   | 6.0  | <u>AGGAGAACTA GGTATG</u>      | hypothetical protein                             | FV3_00087 [Enterobacteria phage vB_EcoM-FV3]                                    | 2E-67  | 102 | 98/102 (96%)   | AEZ652 23     |
| orf88  | 72546 | 73685 | 379 | 43.4 | 8.4  | <u>AGGAGGGTCTT TG</u>         | exodeoxyribonuclease                             | exodeoxyribonuclease_gp090 [Escherichia phage rv5]                              | 0      | 379 | 378/379 (99%)  | YP_002 003592 |
| orf89  | 73685 | 74017 | 110 | 12.5 | 4.1  | <u>TGGAGCAATTT GATG</u>       | hypothetical protein                             | rv5_gp091 [Escherichia phage rv5]                                               | 9E-71  | 110 | 106/109 (97%)  | YP_002 003593 |
| orf90  | 74014 | 74643 | 209 | 23.3 | 8.3  | <u>AGGATGAGGA AGCATG</u>      | hypothetical protein                             | rv5_gp092 [Escherichia phage rv5]                                               | 6E-152 | 209 | 209/209 (100%) | YP_002 003594 |
| orf91  | 74922 | 75200 | 92  | 10.9 | 4.9  | <u>AGGC*GTGCG CCGGATG</u>     | EndoVII packaging and recombination endonuclease | EndoVII packaging and recombination endonuclease_gp093 [Escherichia phage rv5]  | 1E-57  | 192 | 89/92 (97%)    | YP_002 003595 |
| orf92  | 75139 | 75360 | 73  | 8.8  | 7.8  | <u>GAGAGATTCT ATG</u>         | hypothetical protein                             | rv5_gp094 [Escherichia phage rv5]                                               | 4E-47  | 73  | 72/73 (99%)    | YP_002 003596 |
| orf93  | 75373 | 76356 | 327 | 38.3 | 6.0  | <u>AGGAATCTTAA CGATG</u>      | DNA pol/ exonuclease                             | rv5_gp095 [Escherichia phage rv5]                                               | 0      | 327 | 326/327 (99%)  | YP_002 003597 |
| orf94  | 76402 | 77220 | 272 | 30.9 | 5.7  | <u>TGGAGGCCACTT TG</u>        | N6-adenine methyltransf.                         | N6-adeninemethyltransferase gp096 [Escherichia phage rv5]                       | 0      | 272 | 268/272 (99%)  | YP_002 003598 |
| orf95  | 77183 | 77641 | 152 | 17.1 | 10.0 | <u>TGGAGACCCG GTATG</u>       | hypothetical protein                             | rv5_gp097 [Escherichia phage rv5]                                               | 2E-105 | 152 | 151/152 (99%)  | YP_002 003599 |
| orf96  | 77669 | 77860 | 63  | 7.2  | 4.1  | <u>TGGAGACCGC AATG</u>        | hypothetical protein                             | rv5_gp098 [Escherichia phage rv5]                                               | 5E-37  | 63  | 61/63 (97%)    | YP_002 003600 |
| orf97  | 77860 | 78474 | 204 | 22.8 | 5.2  | <u>CGGAGGTTTT GATG</u>        | hypothetical protein                             | rv5_gp099 [Escherichia phage rv5]                                               | 4E-149 | 204 | 204/204 (100%) | YP_002 003601 |
| orf98  | 78468 | 78710 | 80  | 9.4  | 4.3  | <u>AG*AGGCCCAA GAAGAATG</u>   | hypothetical protein                             | rv5_gp100 [Escherichia phage rv5]                                               | 2E-48  | 197 | 77/79 (97%)    | YP_002 003602 |
| orf99  | 78715 | 79062 | 115 | 13.4 | 7.0  | <u>AGGGGGGCTA TTGAGGTTATG</u> | hypothetical protein                             | rv5_gp100 [Escherichia phage rv5]                                               | 2E-77  | 197 | 114/115 (99%)  | YP_002 003602 |
| orf100 | 79064 | 79264 | 66  | 7.5  | 9.3  | <u>AGAAGGTTATT GAAATG</u>     | hypothetical protein                             | rv5_gp101 [Escherichia phage rv5]                                               | 2E-41  | 66  | 66/66 (100%)   | YP_002 003603 |
| orf101 | 79264 | 80247 | 327 | 37.6 | 6.1  | <u>AGGAGAGCTA AATAATG</u>     | thymidylate synthase                             | thymidylate synthase_gp102 [Escherichia phage rv5]                              | 0      | 327 | 324/237 (99%)  | YP_002 003604 |
| orf102 | 80346 | 80807 | 153 | 17.5 | 7.8  | <u>TGGAGACAGA TATG</u>        | hypothetical protein                             | rv5_gp103 [Escherichia phage rv5]                                               | 1E-106 | 153 | 151/153 (99%)  | YP_002 003605 |
| orf103 | 80818 | 81048 | 76  | 9    | 4.1  | <u>AGGTGGTGAA GATG</u>        | hypothetical protein                             | FV3_00102 [Enterobacteria phage vB_EcoM-FV3]                                    | 1E-47  | 100 | 75/76 (99%)    | AEZ652 38     |
| orf104 | 81045 | 83360 | 771 | 87.3 | 6.0  | <u>TGGAGGAAGC AAATG</u>       | ribonucleotide triphosphate reductase            | ribonucleoside triphosphate reductase alpha chain_gp105 [Escherichia phage rv5] | 0      | 771 | 765/771 (99%)  | YP_002 003607 |
| orf105 | 83399 | 84487 | 362 | 41.8 | 4.5  | <u>AG*AGGTAGA ATAATG</u>      | ribonucleotide diphosphate reductase             | ribonucleoside diphosphate reductase beta chain_gp106 [Escherichia phage rv5]   | 0      | 362 | 361/362 (99%)  | YP_002 003608 |
| orf106 | 84491 | 84769 | 92  | 10.4 | 6.7  | <u>GGGAGTTTTAA TACATG</u>     | glutaredoxin 1                                   | glutaredoxin 1_gp107 [Escherichia phage rv5]                                    | 6E-60  | 92  | 92/92 (100%)   | YP_002 003609 |
| orf107 | 84766 | 86889 | 707 | 78.9 | 5.7  | <u>TGGAGAGAAA AAGTG</u>       | anaerobic ribonucleoside-triphosphate            | anaerobic ribonucleoside-triphosphatereductase_gp108 [Escherichia phage rv5]    | 0      | 707 | 701/707 (99%)  | YP_002 003610 |

|        |       |        |     |      |     |                               |                                       |                                                                          |        |     |                |                  |
|--------|-------|--------|-----|------|-----|-------------------------------|---------------------------------------|--------------------------------------------------------------------------|--------|-----|----------------|------------------|
| orf108 | 86953 | 87069  | 38  | 4.5  | 8.2 | <u>AGGAGGTACA</u><br>GTATG    | reductase                             | Sec23 protein, putative [Entamoeba nuttalli P19]                         | 0.32   | 726 | 16/33 (48%)    | EKE377<br>94     |
| orf109 | 87066 | 87539  | 157 | 17.6 | 5.4 | <u>CGGAG*TATCT</u><br>ATG     | anaerobic NTP reductase small subunit | anaerobic NTP reductase small subunit [Enterobacteria phage vB_EcoM-FV3] | 1E-104 | 163 | 147/157 (94%)  | AEZ652<br>45     |
| orf110 | 87604 | 87717  | 37  | 4.5  | 9.8 | <u>AGGAGGTGCC</u><br>AAATG    | hypothetical protein                  | FV3_00110 [Enterobacteria phage vB_EcoM-FV3]                             | 3E-14  | 37  | 37/37 (100%)   | AEZ652<br>46     |
| orf111 | 87714 | 88064  | 116 | 13.3 | 5.2 | <u>AGGGGGTGCA</u><br>ACAGTG   | hypothetical protein                  | FV3_00111 [Enterobacteria phage vB_EcoM-FV3]                             | 7E-76  | 116 | 115/116 (99%)  | AEZ652<br>47     |
| orf112 | 88103 | 88891  | 262 | 29.6 | 9.2 | <u>AGGA*GTCCCA</u><br>ACATG   | PhoH-like protein                     | PhoH-like protein_gp115 [Escherichia phage rv5]                          | 0      | 262 | 262/262 (100%) | YP_002<br>003617 |
| orf113 | 88995 | 89306  | 103 | 12   | 9.1 | <u>AGGAGATAGT</u><br>ATG      | hypothetical protein                  | rv5_gp116 [Escherichia phage rv5]                                        | 1E-65  | 103 | 99/103 (96%)   | YP_002<br>003618 |
| orf114 | 89367 | 90416  | 349 | 38.5 | 5.1 | <u>AGGATTCTCA</u><br>TG       | ClpP ATP-dep. protease subunit        | ClpP ATP-dependent protease subunit_gp117 [Escherichia phage rv5]        | 0      | 349 | 348/348 (100%) | YP_002<br>003619 |
| orf115 | 90468 | 91001  | 117 | 20.6 | 4.6 | <u>TGGAGATTGCA</u><br>ATG     | hypothetical protein                  | rv5_gp118 [Escherichia phage rv5]                                        | 5E-127 | 177 | 175/177 (99%)  | YP_002<br>003620 |
| orf116 | 90998 | 91282  | 94  | 10.2 | 6.2 | <u>AGGCAGATTG</u><br>AAATG    | hypothetical protein                  | rv5_gp119 [Escherichia phage rv5]                                        | 8E-63  | 94  | 94/94 (100%)   | YP_002<br>003621 |
| orf117 | 91318 | 91557  | 79  | 9.5  | 6.0 | <u>AGGGGGTGCA</u><br>TTTATG   | hypothetical protein                  | rv5_gp120 [Escherichia phage rv5]                                        | 3E-51  | 79  | 79/79 (100%)   | YP_002<br>003622 |
| orf118 | 91554 | 91952  | 132 | 14.4 | 4.9 | <u>AGGAGCCCAG</u><br>TGTATG   | hypothetical protein                  | rv5_gp121 [Escherichia phage rv5]                                        | 3E-86  | 132 | 127/132 (96%)  | YP_002<br>003623 |
| orf119 | 91992 | 92225  | 77  | 8.3  | 5.3 | <u>AGGAGGTAGC</u><br>ATG      | hypothetical protein                  | FV3_00119 [Enterobacteria phage vB_EcoM-FV3]                             | 7E-47  | 77  | 77/77 (100%)   | AEZ652<br>55     |
| orf120 | 92231 | 92749  | 172 | 20.2 | 7.7 | <u>AGGAG*TGACA</u><br>GGTATG  | hypothetical protein                  | FV3_00120 [Enterobacteria phage vB_EcoM-FV3]                             | 1E-119 | 172 | 164/172 (95%)  | AEZ652<br>56     |
| orf121 | 92751 | 92987  | 78  | 8.8  | 7.6 | <u>AGGAGATGTA</u><br>ATATG    | hypothetical protein                  | FV3_00121 [Enterobacteria phage vB_EcoM-FV3]                             | 8E-47  | 78  | 76/78 (97%)    | AEZ652<br>57     |
| orf122 | 92971 | 93102  | 43  | 5    | 5.0 | <u>AGGAGGCAGA</u><br>TAAGAATG | hypothetical protein                  | FV3_00122 [Enterobacteria phage vB_EcoM-FV3]                             | 4E-21  | 43  | 43/43 (100%)   | AEZ652<br>58     |
| orf123 | 93048 | 93221  | 57  | 6.3  | 7.9 | no RBS                        | hypothetical protein                  | FV3_00123 [Enterobacteria phage vB_EcoM-FV3]                             | 2E-30  | 57  | 56/57 (98%)    | AEZ652<br>59     |
| orf124 | 93208 | 93393  | 61  | 7.5  | 4.3 | <u>AGGAGACAGC</u><br>AATG     | hypothetical protein                  | rv5_gp127 [Escherichia phage rv5]                                        | 4E-36  | 61  | 60/61 (98%)    | YP_002<br>003629 |
| orf125 | 93396 | 93851  | 151 | 17.5 | 9.1 | <u>AGG*GGTIGACG</u><br>ATG    | hypothetical protein                  | structural protein_gp128 [Escherichia phage rv5]                         | 1E-100 | 151 | 147/151 (97%)  | YP_002<br>003630 |
| orf126 | 93912 | 94259  | 115 | 13.2 | 4.8 | <u>AAGAGGTAGA</u><br>GAGATG   | hypothetical protein                  | rv5_gp129 [Escherichia phage rv5]                                        | 2E-76  | 115 | 112/115 (97%)  | YP_002<br>003631 |
| orf127 | 94256 | 94543  | 95  | 10.9 | 8.6 | <u>AGGAGGCTCA</u><br>ATG      | hypothetical protein                  | rv5_gp130 [Escherichia phage rv5]                                        | 1E-59  | 95  | 91/95 (96%)    | YP_002<br>003632 |
| orf128 | 94540 | 94740  | 66  | 7.7  | 4.6 | <u>AGGAG*TAGA</u><br>AAATG    | hypothetical protein                  | rv5_gp131 [Escherichia phage rv5]                                        | 2E-38  | 66  | 64/66 (97%)    | YP_002<br>003633 |
| orf129 | 94760 | 94945  | 61  | 7.2  | 4.8 | <u>TGGAGGGTTTT</u><br>TATG    | hypothetical protein                  | rv5_gp132 [Escherichia phage rv5]                                        | 5E-38  | 61  | 61/61 (100%)   | YP_002<br>003634 |
| orf130 | 95041 | 95334  | 97  | 11.2 | 8.5 | <u>GCGAGGCTGA</u><br>ATTATG   | hypothetical protein                  | rv5_gp133 [Escherichia phage rv5]                                        | 1E-55  | 98  | 81/96 (84%)    | YP_002<br>003635 |
| orf131 | 95338 | 95619  | 93  | 10.8 | 7.6 | <u>AG*AGGACTAA</u><br>GTAATG  | hypothetical protein                  | rv5_gp134 [Escherichia phage rv5]                                        | 1E-50  | 93  | 78/93 (84%)    | YP_002<br>003636 |
| orf132 | 95619 | 95843  | 74  | 8.2  | 4.1 | <u>AGGAGACCGT</u><br>TGATG    | hypothetical protein                  | rv5_gp135 [Escherichia phage rv5]                                        | 2E-45  | 74  | 72/74 (97%)    | YP_002<br>003637 |
| orf133 | 95833 | 96087  | 84  | 9.3  | 4.7 | <u>TGGAGGATGA</u><br>TCATG    | hypothetical protein                  | rv5_gp136 [Escherichia phage rv5]                                        | 8E-53  | 84  | 82/84 (98%)    | YP_002<br>003638 |
| orf134 | 96100 | 96498  | 132 | 15   | 7.9 | <u>GATGGGTAAC</u><br>CGTTGTG  | hypothetical protein                  | rv5_gp137 [Escherichia phage rv5]                                        | 5E-91  | 132 | 128/132 (97%)  | YP_002<br>003639 |
| orf135 | 96516 | 96806  | 96  | 10.7 | 4.3 | <u>GTGAGGIGTCA</u><br>CCATG   | hypothetical protein                  | rv5_gp138 [Escherichia phage rv5]                                        | 7E-59  | 96  | 93/96 (97%)    | YP_002<br>003640 |
| orf136 | 96889 | 97206  | 105 | 11.5 | 9.0 | <u>AAAAGGAACA</u><br>TGTTGTG  | sigma 54 modulation factor            | sigma 54 modulation factor_gp139 [Escherichia phage rv5]                 | 6E-59  | 105 | 102/105 (97%)  | YP_002<br>003641 |
| orf137 | 97216 | 97317  | 33  | 3.6  | 5.9 | <u>ATGAGGIGCTA</u><br>CAATG   | hypothetical protein                  | rv5_gp140 [Escherichia phage rv5]                                        | 3E-13  | 33  | 32/33 (97%)    | YP_002<br>003642 |
| orf138 | 97344 | 97613  | 89  | 9.9  | 4.4 | <u>AGGAGACCTCT</u><br>AAATG   | hypothetical protein                  | rv5_gp141 [Escherichia phage rv5]                                        | 1E-55  | 89  | 89/89 (100%)   | YP_002<br>003643 |
| orf139 | 97709 | 97972  | 87  | 9.7  | 4.2 | <u>AGGTGATACTA</u><br>TATG    | hypothetical protein                  | rv5_gp142 [Escherichia phage rv5]                                        | 2E-54  | 87  | 84/87 (97%)    | YP_002<br>003644 |
| orf140 | 97977 | 98309  | 110 | 12.1 | 4.7 | <u>TGTTGGGTGAG</u><br>AATATG  | hypothetical protein                  | rv5_gp143 [Escherichia phage rv5]                                        | 3E-72  | 110 | 108/110 (98%)  | YP_002<br>003645 |
| orf141 | 98309 | 98704  | 131 | 15   | 4.9 | <u>AGGAGGTGCG</u><br>GTAATG   | hypothetical protein                  | rv5_gp144 [Escherichia phage rv5]                                        | 5E-82  | 131 | 128/131 (98%)  | YP_002<br>003646 |
| orf142 | 98784 | 99041  | 85  | 9.3  | 4.2 | <u>AGGAGACCGA</u><br>TTGATG   | hypothetical protein                  | rv5_gp145 [Escherichia phage rv5]                                        | 1E-43  | 85  | 72/85 (85%)    | YP_002<br>003647 |
| orf143 | 99042 | 99392  | 116 | 12.8 | 3.8 | <u>AGGCCTIGTA</u><br>AATG     | hypothetical protein                  | rv5_gp146 [Escherichia phage rv5]                                        | 1E-72  | 116 | 114/116 (98%)  | YP_002<br>003648 |
| orf144 | 99392 | 99721  | 109 | 12.3 | 4.4 | <u>AGGAGGACGA</u><br>ATAATG   | hypothetical protein                  | FV3_00144 [Enterobacteria phage vB_EcoM-FV3]                             | 1E-71  | 109 | 107/109 (98%)  | AEZ652<br>80     |
| orf145 | 99721 | 100008 | 95  | 10.5 | 4.8 | <u>TGGAGGAAGA</u><br>CTAATG   | hypothetical protein                  | FV3_00145 [Enterobacteria phage vB_EcoM-FV3]                             | 5E-59  | 95  | 90/95 (95%)    | AEZ652<br>81     |

|        |        |        |     |      |      |                                                      |                      |                                              |        |     |                |              |
|--------|--------|--------|-----|------|------|------------------------------------------------------|----------------------|----------------------------------------------|--------|-----|----------------|--------------|
| orf146 | 100098 | 100361 | 87  | 10.1 | 8.9  | <u>AGTGAGGTGCT</u><br><u>TGTATG</u>                  | hypothetical protein | rv5_gp150 [Escherichia phage rv5]            | 2E-55  | 87  | 86/87 (99%)    | YP_002003652 |
| orf147 | 100390 | 100530 | 46  | 5.1  | 4.6  | <u>AAGAGGTGAG</u><br><u>GAATG</u>                    | hypothetical protein | rv5_gp151 [Escherichia phage rv5]            | 2E-23  | 46  | 45/46 (98%)    | YP_002003653 |
| orf148 | 100517 | 100768 | 83  | 9.3  | 4.3  | <u>AGGAGCGCAG</u><br><u>TAATG</u>                    | hypothetical protein | rv5_gp152 [Escherichia phage rv5]            | 4E-51  | 83  | 83/83 (100%)   | YP_002003654 |
| orf149 | 100797 | 101102 | 101 | 11.9 | 5.3  | <u>AGGAGACTCTT</u><br><u>ACTATG</u>                  | hypothetical protein | rv5_gp153 [Escherichia phage rv5]            | 1E-62  | 101 | 101/101 (100%) | YP_002003655 |
| orf150 | 101158 | 101484 | 108 | 12.5 | 4.8  | <u>AGGAGATTTG</u><br><u>AGATG</u>                    | hypothetical protein | FV3_00150 [Enterobacteria phage vB_EcoM-FV3] | 4E-69  | 108 | 104/108 (96%)  | AEZ65286     |
| orf151 | 101493 | 101792 | 99  | 11.5 | 5.4  | <u>GTGAGGTGGA</u><br><u>TTATG</u>                    | hypothetical protein | rv5_gp155 [Escherichia phage rv5]            | 1E-65  | 99  | 97/99 (98%)    | YP_002003657 |
| orf152 | 102067 | 102156 | 29  | 2.9  | 5.8  | <u>TGGAGAATAT</u><br><u>GGAATACACA</u><br><u>ATG</u> | hypothetical protein | no hit                                       |        |     |                |              |
| orf153 | 102153 | 102365 | 70  | 7.9  | 4.0  | <u>CACGGGTGGA</u><br><u>ACATG</u>                    | hypothetical protein | rv5_gp157 [Escherichia phage rv5]            | 1E-41  | 101 | 67/70 (96%)    | YP_002003659 |
| orf154 | 102487 | 102702 | 71  | 8.0  | 3.8  | <u>AGGAGATTTTA</u><br><u>TG</u>                      | hypothetical protein | rv5_gp158 [Escherichia phage rv5]            | 2E-43  | 93  | 71/71 (100%)   | YP_002003660 |
| orf155 | 103517 | 103395 | 40  | 4.1  | 10.3 | <u>ACGG*GGTATA</u><br><u>TG</u>                      | hypothetical protein | no hit                                       |        |     |                |              |
| orf156 | 105715 | 105296 | 139 | 16.1 | 6.1  | <u>AAAGAGGTA</u><br><u>AAACACCATG</u>                | hypothetical protein | rv5_gp159 [Escherichia phage rv5]            | 3E-94  | 139 | 134/139 (96%)  | YP_002003661 |
| orf157 | 106124 | 105861 | 87  | 10.7 | 8.6  | <u>AG*AGGTAAAC</u><br><u>ATCATG</u>                  | hypothetical protein | rv5_gp160 [Escherichia phage rv5]            | 1E-42  | 87  | 84/87 (97%)    | YP_002003662 |
| orf158 | 106457 | 106185 | 90  | 10.4 | 4.4  | <u>AGAGAGGAAA</u><br><u>ACACTGTG</u>                 | hypothetical protein | rv5_gp162 [Escherichia phage rv5]            | 1E-56  | 90  | 86/90 (96%)    | YP_002003664 |
| orf159 | 106860 | 106669 | 63  | 7.4  | 6.1  | <u>AGAGCGGTAA</u><br><u>AAATG</u>                    | hypothetical protein | rv5_gp164 [Escherichia phage rv5]            | 1E-23  | 63  | 46/63 (73%)    | YP_002003666 |
| orf160 | 107007 | 106873 | 44  | 4.8  | 8.3  | no RBS                                               | hypothetical protein | FV3_00157 [Enterobacteria phage vB_EcoM-FV3] | 1E-14  | 44  | 36/44 (82%)    | AEZ65293     |
| orf161 | 107294 | 107010 | 94  | 10.4 | 5.8  | <u>AG*AGGATGG</u><br><u>ACACAATG</u>                 | hypothetical protein | rv5_gp166 [Escherichia phage rv5]            | 6E-60  | 94  | 92/94 (98%)    | YP_002003668 |
| orf162 | 107601 | 107386 | 71  | 8.1  | 9.7  | <u>GTGAGGITGCC</u><br><u>AAATG</u>                   | hypothetical protein | FV3_00159 [Enterobacteria phage vB_EcoM-FV3] | 3E-42  | 71  | 70/71 (99%)    | AEZ65295     |
| orf163 | 107715 | 107611 | 34  | 3.4  | 8.4  | <u>AGAGAA*TAA</u><br><u>ACACCATG</u>                 | hypothetical protein | rv5_gp168 [Escherichia phage rv5]            | 2E-11  | 46  | 32/34 (94%)    | YP_002003670 |
| orf164 | 108038 | 107793 | 81  | 9.2  | 9.6  | <u>AAAGAGGTA</u><br><u>CAACATG</u>                   | hypothetical protein | Phi92_gp232 [Enterobacteria phage phi92]     | 8E-36  | 79  | 60/79 (76%)    | CBY99661     |
| orf165 | 108309 | 108130 | 59  | 7.0  | 4.4  | <u>AG*AGGATA</u><br><u>AAAATCATG</u>                 | hypothetical protein | rv5_gp169 [Escherichia phage rv5]            | 1E-32  | 59  | 59/59 (100%)   | YP_002003671 |
| orf166 | 108619 | 108386 | 77  | 8.7  | 8.0  | <u>AGAGAGGCAA</u><br><u>ATCATCATG</u>                | hypothetical protein | rv5_gp170 [Escherichia phage rv5]            | 1E-48  | 77  | 75/77 (97%)    | YP_002003672 |
| orf167 | 108960 | 108676 | 94  | 10.8 | 4.3  | <u>AGGAGTTAAA</u><br><u>ACCATG</u>                   | hypothetical protein | FV3_00164 [Enterobacteria phage vB_EcoM-FV3] | 2E-58  | 99  | 89/94 (95%)    | AEZ65300     |
| orf168 | 109485 | 109186 | 99  | 11.1 | 4.5  | <u>AGGAG*IGATA</u><br><u>AACATG</u>                  | hypothetical protein | FV3_00165 [Enterobacteria phage vB_EcoM-FV3] | 6E-55  | 101 | 87/98 (89%)    | AEZ65301     |
| orf169 | 109778 | 109578 | 66  | 7.6  | 8.0  | <u>AGGAGAAACA</u><br><u>AAATG</u>                    | hypothetical protein | rv5_gp174 [Escherichia phage rv5]            | 3E-38  | 66  | 65/66 (98%)    | YP_002003676 |
| orf170 | 110039 | 109920 | 39  | 4.5  | 9.5  | <u>AGG*GGGAGA</u><br><u>CGATG</u>                    | hypothetical protein | rv5_gp176 [Escherichia phage rv5]            | 6E-18  | 39  | 38/39 (97%)    | YP_002003678 |
| orf171 | 110281 | 110036 | 81  | 9.6  | 6.7  | <u>AGA*GGAATA</u><br><u>GAAAATATG</u>                | hypothetical protein | rv5_gp177 [Escherichia phage rv5]            | 1E-35  | 81  | 68/81 (84%)    | YP_002003679 |
| orf172 | 110630 | 110259 | 123 | 14.0 | 7.8  | <u>AAGAGGTACA</u><br><u>TAGAATG</u>                  | hypothetical protein | rv5_gp178 [Escherichia phage rv5]            | 7E-83  | 123 | 121/123 (98%)  | YP_002003680 |
| orf173 | 111075 | 110695 | 126 | 14.5 | 6.1  | <u>AAAGAGAAAA</u><br><u>CATTATG</u>                  | hypothetical protein | FV3_00170 [Enterobacteria phage vB_EcoM-FV3] | 3E-88  | 126 | 124/126 (98%)  | AEZ65306     |
| orf174 | 111790 | 111167 | 207 | 24.1 | 4.4  | <u>AGGAGAAAAT</u><br><u>ATCATG</u>                   | hypothetical protein | FV3_00171 [Enterobacteria phage vB_EcoM-FV3] | 2E-144 | 207 | 202/207 (98%)  | AEZ65307     |
| orf175 | 112125 | 111865 | 86  | 10.3 | 9.9  | <u>AGGAG*IAAAC</u><br><u>ACTATG</u>                  | hypothetical protein | rv5_gp181 [Escherichia phage rv5]            | 3E-54  | 86  | 84/86 (98%)    | YP_002003683 |
| orf176 | 112568 | 112371 | 65  | 8.2  | 10.6 | <u>AGCAAGGGTG</u><br><u>GGAATATATG</u>               | hypothetical protein | rv5_gp184 [Escherichia phage rv5]            | 4E-37  | 65  | 64/65 (98%)    | YP_002003686 |
| orf177 | 112912 | 112565 | 115 | 13   | 7.8  | <u>AGGAGAAAGT</u><br><u>AACATG</u>                   | hypothetical protein | rv5_gp185 [Escherichia phage rv5]            | 5E-75  | 117 | 110/113 (97%)  | YP_002003687 |
| orf178 | 113233 | 112988 | 81  | 9.2  | 8.7  | <u>AGGAGTTAAA</u><br><u>ACCATG</u>                   | hypothetical protein | rv5_gp186 [Escherichia phage rv5]            | 2E-49  | 81  | 78/81 (96%)    | YP_002003688 |
| orf179 | 113664 | 113323 | 113 | 13.2 | 3.8  | <u>AGGAGAAAA</u><br><u>ACCATG</u>                    | hypothetical protein | FV3_00176 [Enterobacteria phage vB_EcoM-FV3] | 2E-71  | 113 | 111/113 (98%)  | AEZ65312     |
| orf180 | 113863 | 113744 | 39  | 4.4  | 9.8  | <u>AGGGGGCTT</u><br><u>AAAGATG</u>                   | hypothetical protein | rv5_gp188 [Escherichia phage rv5]            | 2E-17  | 39  | 36/39 (92%)    | YP_002003690 |
| orf181 | 114339 | 113944 | 131 | 15   | 9.5  | <u>AG*AGGAAAA</u><br><u>GCTATG</u>                   | hypothetical protein | rv5_gp189 [Escherichia phage rv5]            | 4E-79  | 134 | 117/134 (87%)  | YP_002003691 |
| orf182 | 114821 | 114423 | 132 | 14.8 | 6.0  | <u>AG*AGGATAA</u><br><u>AATCATG</u>                  | hypothetical protein | rv5_gp190 [Escherichia phage rv5]            | 2E-87  | 132 | 127/132 (96%)  | YP_002003692 |
| orf183 | 115083 | 114886 | 65  | 7.6  | 10.5 | <u>AG*AGGATAA</u><br><u>AAAATCATG</u>                | hypothetical protein | rv5_gp191 [Escherichia phage rv5]            | 8E-38  | 94  | 62/65 (95%)    | YP_002003693 |
| orf184 | 115323 | 115162 | 53  | 5.7  | 4.9  | <u>GGGAGGTACA</u><br><u>AAAATG</u>                   | hypothetical protein | FV3_00181 [Enterobacteria phage vB_EcoM-FV3] | 4E-19  | 58  | 43/46 (93%)    | AEZ65317     |
| orf185 | 115733 | 115455 | 92  | 10.2 | 8.8  | <u>AGGAGTICTCA</u>                                   | hypothetical         | rv5_gp193 [Escherichia                       | 1E-56  | 92  | 86/92          | YP_002       |

|        |        |        |     |       |      |                                      |                              |                                                                        |        |     |                   |                  |
|--------|--------|--------|-----|-------|------|--------------------------------------|------------------------------|------------------------------------------------------------------------|--------|-----|-------------------|------------------|
|        |        |        |     |       |      | TTAGAATTT<br>GAATG                   | protein                      | phage rv5]                                                             |        |     | (93%)             | 003695           |
| orf186 | 116230 | 116069 | 53  | 6.5   | 10.2 | <u>AGAAAATCAG</u><br>AAAATG          | hypothetical<br>protein      | rv5_gp194 [Escherichia<br>phage rv5]                                   | 1.1    | 70  | 15/32<br>(47%)    | YP_002<br>003696 |
| orf187 | 116669 | 116340 | 109 | 12.7  | 9.4  | <u>AGG*GGACGA</u><br>CAAATG          | hypothetical<br>protein      | rv5_gp195 [Escherichia<br>phage rv5]                                   | 2E-74  | 109 | 108/109<br>(99%)  | YP_002<br>003697 |
| orf188 | 116863 | 116666 | 65  | 7.5   | 9.1  | <u>AGGAGGGTGC</u><br>AGATG           | hypothetical<br>protein      | FV3_00185 [Enterobacteria<br>phage vB_EcoM-FV3]                        | 4E-36  | 67  | 63/65<br>(97%)    | AEZ653<br>21     |
| orf189 | 117101 | 116856 | 81  | 8.8   | 4.6  | <u>AGGAGATAAAA</u><br>GTATG          | hypothetical<br>protein      | rv5_gp198 [Escherichia<br>phage rv5]                                   | 9E-51  | 81  | 80/81<br>(99%)    | YP_002<br>003700 |
| orf190 | 117454 | 117122 | 110 | 12.4  | 4.8  | <u>AGTGAGTATCG</u><br>TGCCATG        | hypothetical<br>protein      | rv5_gp199 [Escherichia<br>phage rv5]                                   | 7E-71  | 110 | 105/110<br>(95%)  | YP_002<br>003701 |
| orf191 | 117656 | 117465 | 63  | 7.6   | 6.0  | <u>AGCGACGTATT</u><br>ATG            | hypothetical<br>protein      | rv5_gp200 [Escherichia<br>phage rv5]                                   | 8E-40  | 63  | 63/63<br>(100%)   | YP_002<br>003702 |
| orf192 | 117914 | 117720 | 64  | 7.7   | 9.3  | <u>AGGATTTGGG</u><br>AGAGAATTAT<br>G | hypothetical<br>protein      | FV3_00189 [Enterobacteria<br>phage vB_EcoM-FV3]                        | 3E-39  | 64  | 60/64<br>(94%)    | AEZ653<br>25     |
| orf193 | 118111 | 117941 | 56  | 6.2   | 4.8  | <u>AGAGAGGGAG</u><br>CACTATG         | hypothetical<br>protein      | rv5_gp203 [Escherichia<br>phage rv5]                                   | 4E-31  | 56  | 53/55<br>(96%)    | YP_002<br>003705 |
| orf194 | 118623 | 118165 | 152 | 16.8  | 6.6  | <u>AGGAGCTGGC</u><br>ATACCGTG        | hypothetical<br>protein      | Tk_4 protein_gp204<br>[Escherichia phage rv5]                          | 5E-88  | 152 | 124/152<br>(82%)  | YP_002<br>003706 |
| orf195 | 119038 | 118613 | 141 | 16.9  | 4.3  | <u>CGGAGAACTA</u><br>AGATG           | hypothetical<br>protein      | FV3_00192[Enterobacteria<br>phage vB_EcoM-FV3]                         | 2E-96  | 141 | 137/141<br>(97%)  | AEZ653<br>28     |
| orf196 | 119304 | 119107 | 65  | 7.7   | 4.3  | <u>AGGAGGCCAC</u><br>TGCCCATG        | hypothetical<br>protein      | rv5_gp206 [Escherichia<br>phage rv5]                                   | 6E-40  | 65  | 65/65<br>(100%)   | YP_002<br>003708 |
| orf197 | 119817 | 119401 | 138 | 16    | 4.3  | <u>AGGAGATCTG</u><br>AAAAATG         | hypothetical<br>protein      | rv5_gp207 [Escherichia<br>phage rv5]                                   | 7E-98  | 138 | 138/138<br>(100%) | YP_002<br>003709 |
| orf198 | 120503 | 119880 | 207 | 24.4  | 9.1  | <u>CGGTAGGICTG</u><br>CAATATG        | endonuclease<br>VII          | endonuclease VII_gp208<br>[Escherichia phage rv5]                      | 8E-150 | 207 | 204/207<br>(99%)  | YP_002<br>003710 |
| orf199 | 121746 | 120475 | 423 | 45.8  | 5.5  | <u>AGGAGACAAA</u><br>TAATG           | hypothetical<br>protein      | rv5_gp209 [Escherichia<br>phage rv5]                                   | 0      | 423 | 421/423<br>(99%)  | YP_002<br>003711 |
| orf200 | 122111 | 121746 | 121 | 13.8  | 4.4  | <u>CGGAGATTCCA</u><br>TAATG          | hypothetical<br>protein      | rv5_gp210 [Escherichia<br>phage rv5]                                   | 2E-79  | 121 | 120/121<br>(99%)  | YP_002<br>003712 |
| orf201 | 122440 | 122195 | 81  | 8.6   | 4.1  | <u>AGGAGACCTT</u><br>AAGATG          | hypothetical<br>protein      | rv5_gp211 [Escherichia<br>phage rv5]                                   | 8E-50  | 81  | 80/81<br>(99%)    | YP_002<br>003713 |
| orf202 | 122760 | 122458 | 100 | 11.6  | 4.3  | <u>AGGAGAAGCA</u><br>GCAAATG         | hypothetical<br>protein      | rv5_gp212 [Escherichia<br>phage rv5]                                   | 4E-65  | 100 | 99/100<br>(99%)   | YP_002<br>003714 |
| orf203 | 123139 | 122750 | 129 | 13.8  | 4.1  | <u>ACGAGGAAGC</u><br>GTAATG          | hypothetical<br>protein      | rv5_gp213 [Escherichia<br>phage rv5]                                   | 7E-85  | 129 | 127/129<br>(98%)  | YP_002<br>003715 |
| orf204 | 123444 | 123139 | 101 | 11.6  | 4.4  | <u>AGGACCTAAT</u><br>ACAATG          | hypothetical<br>protein      | FV3_00200[Enterobacteria<br>phage vB_EcoM-FV3]                         | 6E-62  | 106 | 95/99<br>(96%)    | AEZ653<br>36     |
| orf205 | 123729 | 123475 | 84  | 9.4   | 4.2  | <u>AGGAGACTGC</u><br>CAAGATG         | hypothetical<br>protein      | FV3_00201[Enterobacteria<br>phage vB_EcoM-FV3]                         | 7E-54  | 84  | 84/84<br>(100%)   | AEZ653<br>37     |
| orf206 | 124177 | 123806 | 123 | 14.6  | 5.1  | <u>AGGAGGTAGG</u><br>ATG             | hypothetical<br>protein      | FV3_00202[Enterobacteria<br>phage vB_EcoM-FV3]                         | 2E-82  | 123 | 119/123<br>(97%)  | AEZ653<br>38     |
| orf207 | 124382 | 124188 | 64  | 7.3   | 5    | <u>AAGAGGGCCT</u><br>ATG             | hypothetical<br>protein      | rv5_gp217 [Escherichia<br>phage rv5]                                   | 1E-38  | 64  | 62/64<br>(97%)    | YP_002<br>003719 |
| orf208 | 124606 | 124379 | 75  | 8.7   | 5.3  | <u>AGAAGGAGAC</u><br>CGATCAATG       | hypothetical<br>protein      | rv5_gp218 [Escherichia<br>phage rv5]                                   | 8E-42  | 75  | 68/75<br>(91%)    | YP_002<br>003720 |
| orf209 | 124887 | 124603 | 94  | 10.7  | 6.5  | <u>AAGAGGAGAC</u><br>TTTTATG         | hypothetical<br>protein      | FV3_00205[Enterobacteria<br>phage vB_EcoM-FV3]                         | 9E-63  | 94  | 93/94<br>(99%)    | YP_007<br>006376 |
| orf210 | 127714 | 124937 | 925 | 106.7 | 6.9  | <u>AGGAGGAGAC</u><br>AGTATG          | DNA<br>polymerase            | DNA pol. [Enterobacteria<br>phage vB_EcoM-FV3]                         | 0      | 809 | 797/808<br>(99%)  | YP_007<br>006380 |
| orf211 | 128445 | 127711 | 244 | 27.6  | 6.7  | <u>AGGAGAACAC</u><br>TTTATG          | HNH<br>endonuclease          | HNH endonuclease<br>[Enterobacteria phage<br>vB_EcoM-FV3]              | 2E-20  | 227 | 69/192<br>(36%)   | YP_007<br>006254 |
| orf212 | 130582 | 128504 | 692 | 77.4  | 5.6  | <u>AGGAGCAGAA</u><br>TTAATG          | DNA helicase/<br>primase     | DNA replicative<br>helicase/primase_gp225<br>[Escherichia phage rv5]   | 0      | 692 | 679/692<br>(98%)  | YP_002<br>003727 |
| orf213 | 131366 | 130572 | 264 | 29.6  | 6.9  | <u>AGGCCCTGCCC</u><br>GAAAGGGTG      | hypothetical<br>protein      | rv5_gp226 [Escherichia<br>phage rv5]                                   | 0      | 254 | 250/254<br>(98%)  | YP_002<br>003728 |
| orf214 | 131870 | 131388 | 160 | 18.5  | 6.1  | <u>AGGAGATAGT</u><br>GTTATG          | hypothetical<br>protein      | rv5_gp227 [Escherichia<br>phage rv5]                                   | 2E-100 | 160 | 155/160<br>(97%)  | YP_002<br>003729 |
| orf215 | 132281 | 131883 | 132 | 14.7  | 4.3  | <u>GGGAGGTTTCT</u><br>GATG           | hypothetical<br>protein      | rv5_gp228 [Escherichia<br>phage rv5]                                   | 1E-78  | 131 | 125/131<br>(95%)  | YP_002<br>003730 |
| orf216 | 132586 | 132281 | 101 | 11.8  | 4.5  | <u>AAGAG*TACAA</u><br>TCAAATG        | hypothetical<br>protein      | rv5_gp229 [Escherichia<br>phage rv5]                                   | 1E-66  | 101 | 99/101<br>(98%)   | YP_002<br>003731 |
| orf217 | 133925 | 132600 | 441 | 50    | 6.3  | <u>AGGAGAGCAC</u><br>CAAACGATG       | adenine<br>methyltransferase | putative adenine<br>methyltransferase_gp230<br>[Escherichia phage rv5] | 0      | 441 | 427/441<br>(97%)  | YP_002<br>003732 |
| orf218 | 134328 | 133987 | 113 | 12.8  | 4.3  | <u>AAGAGGGGGA</u><br>CGTATG          | hypothetical<br>protein      | rv5_gp231 [Escherichia<br>phage rv5]                                   | 4E-76  | 113 | 112/113<br>(99%)  | YP_002<br>003733 |
| orf219 | 135695 | 134325 | 456 | 51.4  | 7.5  | <u>AGGAGGCGTA</u><br>ATG             | putative<br>helicase         | putative helicase_gp232<br>[Escherichia phage rv5]                     | 0      | 456 | 456/456<br>(100%) | YP_002<br>003734 |
| orf220 | 136900 | 135695 | 401 | 45.8  | 4.8  | <u>AGGAGACCAA</u><br>GATG            | rIIB protector               | rIIB protector_gp233<br>[Escherichia phage rv5]                        | 0      | 401 | 401/401<br>(100%) | YP_002<br>003735 |

27 <sup>a</sup>RBS consensus sequence of *E. coli* AGGAGGT.

28 <sup>b</sup>Identity = a.a. protein phage 2/a.a. protein with a hit (% identity).

29



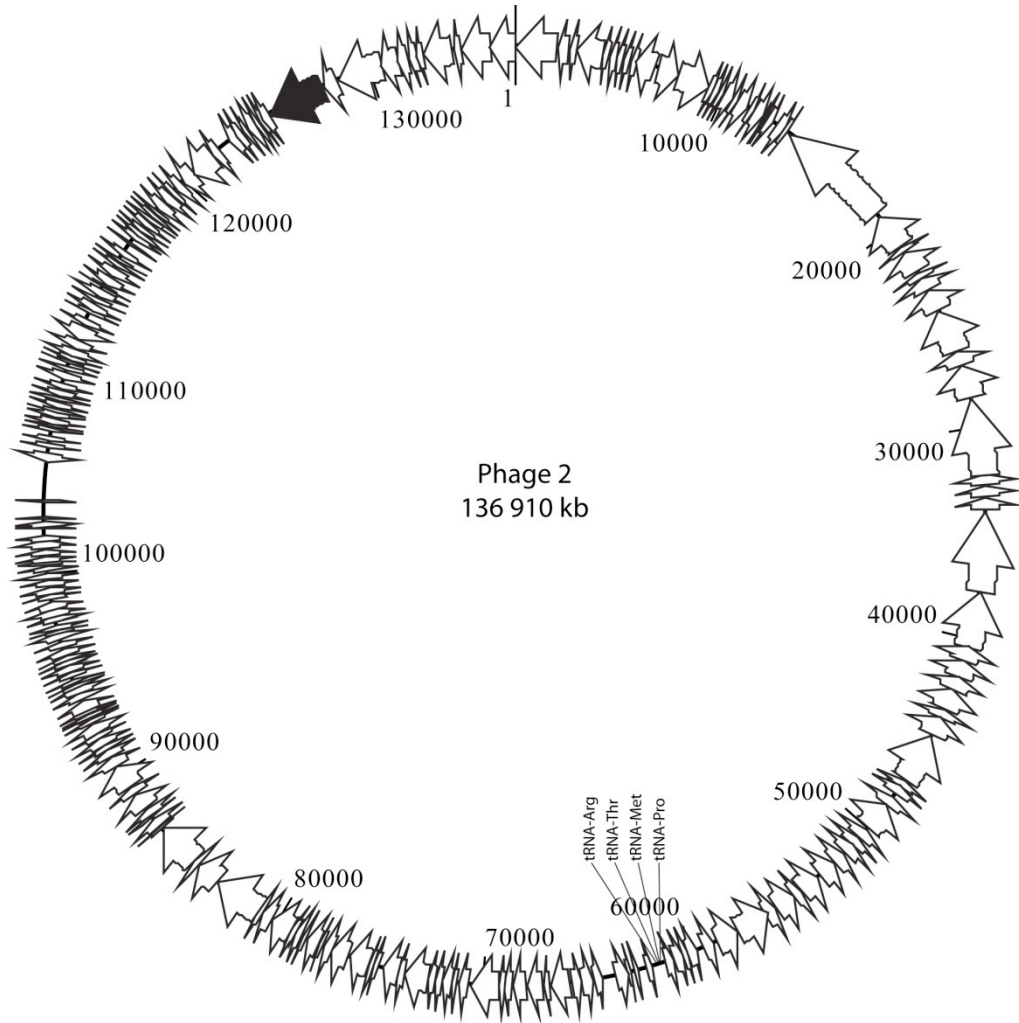

30

31 **Figure S1.** Genomic map of the coliphage 2 genome. Each arrow represents a putative ORF. The  
 32 black arrow is gene *orf210*.

33

33

34

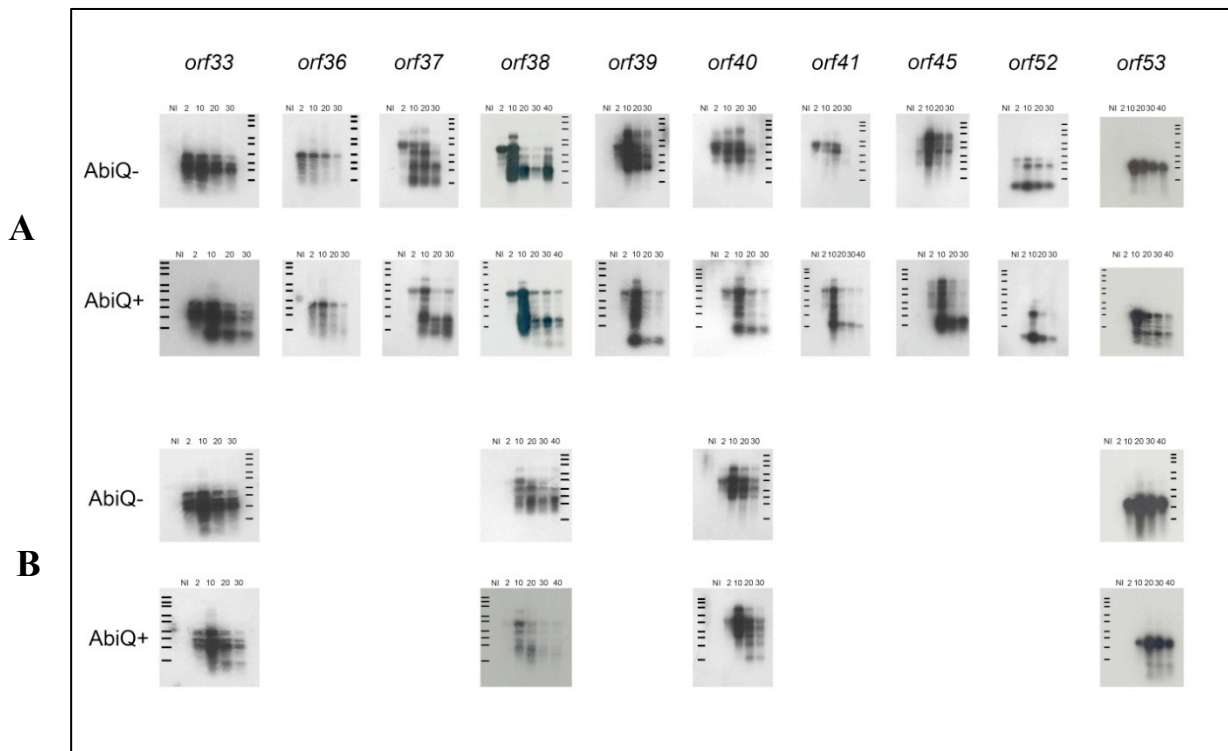

35

36 **Figure S2.** Northern blot results for phages P008 (Panel A) and P008-Q12 (Panel B) early- and  
37 middle-expressed genes. A time course experiment of phage-infected *L. lactis* IL1403 with or  
38 without AbiQ was performed and samples were withdrawn at time NI (Non-Infected), 2, 10, 20,  
39 30 and 40 minutes. Total RNA was extracted with Trizol (Invitrogen) and migrated through 1%  
40 agarose-formaldehyde gels. The transfer to nylon membrane and hybridization procedure is  
41 described in Materials and Methods. The probes presented here detect the sense transcript for  
42 early-expressed (from *orf33* to *orf52*) and middle-expressed (*orf53*) genes (named *\_s2* in the  
43 Table S1). The ladder used is the 0.5-10 kb ladder (Invitrogen) with bands in the following order:  
44 10, 8, 6, 4, 3, 2, 1.5, 1, and 0.5 kb.

45

45

46 A)

47

48

49

50

51

52

53

54

55

```

          10      20      30      40      50      60      70
.....|.....|.....|.....|.....|.....|.....|.....|.....|.....|.....|.....|.....|... Similarity/Identity
P008-ORF38  MYTAEEREQIIDIIVDKMSLLRQDFDGAFTWIKENVAMPFDGEEQQFISDLKQLVKINALKFGKIYEGVLN*
bIL170-E14  .....A.....S.....* 96%/97%
sk1-ORF33   .....S.....E.....* 96%/97%
712-ORF33   ..L.K.....K.....R..S.....* 92%/93%
jj50-ORF32  .....S.....N.....* 96%/97%
p2-ORF33    .....S.....E.....* 96%/97%

```

56 B)

57

58

59

60

61

62

63

64

65

```

          10      20      30      40
.....|.....|.....|.....|.....|.....|.....|.....|.....|.....|.....|.....|.....|... Similarity/Identity
bIL170-m1   MTEEQLLFKQETLSKVDFNELFLNAVECGLINLDTALIFKGE*
P008-orf53  .....M.....* 98%/98%
sk1-orf51   .....E.....* 98%/98%
jj50-orf46  .....E.....* 98%/98%
712-orf51   ..D.....V.....* 95%/95%
p2-orf46    .....E.....* 98%/98%

```

66 **Figure S3.** Alignments of A) ORF38 (P008) and B) M1 (bIL170) proteins with their  
67 homologues in 936 phages. The similarity and identity of the proteins was calculated using  
68 Bioedit software.

70 **Additional references**

- 71 1. **Lukashin AV, Borodovsky M.** 1998. GeneMark.hmm: new solutions for gene finding.  
72 Nucleic Acids Res. **26**:1107-1115
- 73 2. **Schattner P, Brooks AN, Lowe TM.** 2005. The tRNAscan-SE, snoscan and snoGPS  
74 web servers for the detection of tRNAs and snoRNAs. Nucleic Acids Res. **33**:W686-689.
- 75 3. **Laslett D, Canback B.** 2004. ARAGORN, a program to detect tRNA genes and tmRNA  
76 genes in nucleotide sequences. Nucleic Acids Res. **32**:11-16.
- 77 4. **Ahmed R, Bopp C, Borczyk A, Kasatiya S.** 1987. Phage-typing scheme for *Escherichia*  
78 *coli* O157:H7. J. Infect. Dis. **155**:806-809.
- 79 5. **Blattner FR, Plunkett G, Bloch CA, Perna NT, Burland V, Riley M, Collado-Vides**  
80 **J, Glasner JD, Rode CK, Mayhew GF, Gregor J, Davis NW, Kirkpatrick HA,**  
81 **Goeden MA, Rose DJ, Mau B, Shao Y.** 1997. The complete genome sequence of  
82 *Escherichia coli* K-12. Science **277**:1453-1462.
- 83 6. **Truncaite L, Simoliunas E, Zajanckauskaite A, Kaliniene L, Mankeviciute R,**  
84 **Staniulis J, Klausas V, Meskys R.** 2012. Bacteriophage vB\_EcoM\_FV3: a new member  
85 of "rV5-like viruses". Arch. Virol. **157**:2431-2435.
